# Supplementary material for: Comparison of the Biomechanical Properties between Healthy and Whole Human and Porcine Stomachs
Source: MDPI journal article supplement (doi:10.3390/bioengineering11030233), 2024-02-28
Supplement: s1 [file s1]

Table S1

Thickness data of porcine and human stomachs. All measures are provided as mean  $\pm$  SD.

|       |        | Thickness (mm)  |                 |                 |
|-------|--------|-----------------|-----------------|-----------------|
|       |        | Intact          | Mucosa          | Muscularis      |
| Pig   | Fundus | 4.14 $\pm$ 0.98 | 1.43 $\pm$ 0.34 | 3.16 $\pm$ 1.00 |
|       | Corpus | 5.26 $\pm$ 0.75 | 2.78 $\pm$ 0.53 | 2.59 $\pm$ 0.60 |
|       | Antrum | 5.17 $\pm$ 0.84 | 2.00 $\pm$ 0.33 | 3.70 $\pm$ 0.75 |
| Human | Fundus | 1.93 $\pm$ 0.61 | 0.98 $\pm$ 0.22 | 1.14 $\pm$ 0.38 |
|       | Corpus | 2.36 $\pm$ 0.55 | 1.23 $\pm$ 0.28 | 1.49 $\pm$ 0.29 |
|       | Antrum | 3.16 $\pm$ 0.71 | 1.20 $\pm$ 0.35 | 2.06 $\pm$ 0.51 |

Table S2

Statistical results of thickness comparisons between different regions of porcine and human stomachs.  $P < 0.05$  were considered statistically significant for all analyses.

|       |            | Fundus vs Corpus | Fundus vs Antrum | Corpus vs Antrum |
|-------|------------|------------------|------------------|------------------|
| Pig   | Intact     | 0.000            | 0.000            | 0.220            |
|       | Mucosa     | 0.000            | 0.000            | 0.000            |
|       | Muscularis | 0.004            | 0.000            | 0.000            |
| Human | Intact     | 0.036            | 0.000            | 0.001            |
|       | Mucosa     | 0.001            | 0.078            | 0.130            |
|       | Muscularis | 0.000            | 0.000            | 0.000            |

Table S3

Statistical results of thickness comparisons between different layers of porcine and human stomachs.  $P < 0.05$  were considered statistically significant for all analyses.

|       |        | Intact vs Mucosa | Intact vs Muscularis | Mucosa vs Muscularis |
|-------|--------|------------------|----------------------|----------------------|
| Pig   | Fundus | 0.000            | 0.000                | 0.000                |
|       | Corpus | 0.000            | 0.000                | 0.000                |
|       | Antrum | 0.000            | 0.000                | 0.000                |
| Human | Fundus | 0.000            | 0.000                | 0.000                |
|       | Corpus | 0.000            | 0.000                | 0.004                |
|       | Antrum | 0.000            | 0.000                | 0.000                |

Table S4

Statistical results of thickness comparisons between porcine and human stomachs.  $P < 0.05$  were considered statistically significant for all analyses.

|        | Intact | Mucosa | Muscularis |
|--------|--------|--------|------------|
| Fundus | 0.000  | 0.000  | 0.000      |
| Corpus | 0.000  | 0.000  | 0.000      |
| Antrum | 0.000  | 0.000  | 0.000      |

Table S5

Elastic modulus for porcine and human stomachs. All measures are provided as mean  $\pm$  SD.

|       |                 |        | Modulus (Kpa)           |                         |                         |
|-------|-----------------|--------|-------------------------|-------------------------|-------------------------|
|       |                 |        | Intact                  | Mucosa                  | Muscularis              |
| Pig   | Longitudinal    | Fundus | 194.684 $\pm$ 85.430    | 1000.970 $\pm$ 413.529  | 149.872 $\pm$ 89.513    |
|       |                 | Corpus | 3694.590 $\pm$ 809.566  | 7041.760 $\pm$ 3002.070 | 6122.722 $\pm$ 1290.145 |
|       |                 | Antrum | 1649.467 $\pm$ 648.268  | 1867.147 $\pm$ 1005.017 | 5513.323 $\pm$ 1435.131 |
|       | Circumferential | Fundus | 80.693 $\pm$ 36.193     | 538.770 $\pm$ 243.056   | 122.988 $\pm$ 48.639    |
|       |                 | Corpus | 613.859 $\pm$ 374.233   | 5442.763 $\pm$ 1774.694 | 229.401 $\pm$ 55.001    |
|       |                 | Antrum | 458.620 $\pm$ 204.209   | 440.388 $\pm$ 141.599   | 272.805 $\pm$ 169.507   |
| Human | Longitudinal    | Fundus | 1359.627 $\pm$ 562.283  | 2295.195 $\pm$ 1420.580 | 954.846 $\pm$ 789.187   |
|       |                 | Corpus | 1131.280 $\pm$ 532.742  | 1916.618 $\pm$ 585.237  | 1506.245 $\pm$ 543.273  |
|       |                 | Antrum | 1759.598 $\pm$ 662.918  | 2106.937 $\pm$ 680.677  | 2729.321 $\pm$ 721.034  |
|       | Circumferential | Fundus | 1519.652 $\pm$ 1080.420 | 1750.177 $\pm$ 870.972  | 1186.412 $\pm$ 668.091  |
|       |                 | Corpus | 1603.627 $\pm$ 844.211  | 1535.957 $\pm$ 819.184  | 954.088 $\pm$ 524.878   |
|       |                 | Antrum | 1736.509 $\pm$ 590.717  | 1620.808 $\pm$ 572.526  | 1447.154 $\pm$ 643.502  |

Table S6

Statistical results of elastic modulus comparisons between different regions of porcine and human stomachs.  $P < 0.05$  were considered statistically significant for all analyses.

|       |                 |            | Fundus vs Corpus | Fundus vs Antrum | Corpus vs Antrum |
|-------|-----------------|------------|------------------|------------------|------------------|
| Pig   | Longitudinal    | Intact     | 0.000            | 0.000            | 0.000            |
|       |                 | Mucosa     | 0.000            | 0.037            | 0.001            |
|       |                 | Muscularis | 0.000            | 0.000            | 1.000            |
|       | Circumferential | Intact     | 0.000            | 0.000            | 1.000            |
|       |                 | Mucosa     | 0.000            | 1.000            | 0.000            |
|       |                 | Muscularis | 0.000            | 0.000            | 1.000            |
| Human | Longitudinal    | Intact     | 0.445            | 0.187            | 0.043            |
|       |                 | Mucosa     | 0.443            | 0.701            | 0.698            |
|       |                 | Muscularis | 0.488            | 0.000            | 0.053            |
|       | Circumferential | Intact     | 0.489            | 0.489            | 0.436            |
|       |                 | Mucosa     | 0.858            | 0.716            | 0.853            |
|       |                 | Muscularis | 0.258            | 0.489            | 0.931            |

Table S7

Statistical results of elastic modulus comparisons between different layers of porcine and human stomachs.  $P < 0.05$  were considered statistically significant for all analyses.

|       |                 |        | Intact vs Mucosa | Intact vs Muscularis | Mucosa vs Muscularis |
|-------|-----------------|--------|------------------|----------------------|----------------------|
| Pig   | Longitudinal    | Fundus | 0.000            | 0.784                | 0.000                |
|       |                 | Corpus | 0.000            | 0.000                | 1.000                |
|       |                 | Antrum | 1.000            | 0.000                | 0.000                |
|       | Circumferential | Fundus | 0.000            | 0.154                | 0.000                |
|       |                 | Corpus | 0.000            | 0.059                | 0.000                |
|       |                 | Antrum | 1.000            | 0.007                | 0.006                |
|       | Longitudinal    | Fundus | 0.072            | 0.423                | 0.013                |
|       |                 | Corpus | 0.009            | 0.189                | 0.152                |
|       |                 | Antrum | 0.323            | 0.010                | 0.083                |
| Human | Circumferential | Fundus | 0.387            | 0.666                | 0.173                |
|       |                 | Corpus | 1.000            | 0.130                | 0.016                |
|       |                 | Antrum | 0.489            | 0.745                | 0.863                |

Table S8

Statistical results of elastic modulus comparisons between different directions of porcine and human stomachs.  $P < 0.05$  were considered statistically significant for all analyses.

|       |        | Intact | Mucosa | Muscularis |
|-------|--------|--------|--------|------------|
| Pig   | Fundus | 0.000  | 0.000  | 0.606      |
|       | Corpus | 0.019  | 0.018  | 0.000      |
|       | Antrum | 0.000  | 0.000  | 0.000      |
| Human | Fundus | 0.931  | 0.262  | 0.753      |
|       | Corpus | 0.320  | 0.853  | 0.063      |
|       | Antrum | 0.802  | 0.161  | 0.972      |

Table S9

Statistical results of elastic modulus comparisons between porcine and human stomachs.  $P < 0.05$  were considered statistically significant for all analyses.

|                 |        | Intact | Mucosa | Muscularis |
|-----------------|--------|--------|--------|------------|
| Longitudinal    | Fundus | 0.000  | 0.001  | 0.000      |
|                 | Corpus | 0.436  | 0.001  | 0.051      |
|                 | Antrum | 0.464  | 0.253  | 0.008      |
| Circumferential | Fundus | 0.000  | 0.000  | 0.000      |
|                 | Corpus | 0.014  | 0.012  | 0.000      |
|                 | Antrum | 0.000  | 0.000  | 0.000      |
